# Supplementary material for: Rab5-family guanine nucleotide exchange factors bind retromer and promote its recruitment to endosomes
Source: PubMed Central journal article supplement — Mol Biol Cell. 2015 Mar 15;26(6):1119–28. doi: 10.1091/mbc.E14-08-1281 (PMC4357511; doi:10.1091/mbc.e14-08-1281), 2015-03-15
Supplement: supp_E14-08-1281v1_CombinedSupMats.pdf [file supp_E14-08-1281v1_CombinedSupMats.pdf]

# Supplemental Materials

*Molecular Biology of the Cell*

Bean et al.

**SUPPLEMENTARY FIGURE 1:** There is a deletion present in lab *Saccharomyces cerevisiae* strains in the gene *YML003W* that is absent from other *S. cerevisiae* and truncates the normal gene product. (A) An alignment of *YML003W* in laboratory/wild *S. cerevisiae* strains and other related fungi. (B) Cells expressing *ADH1pr-3HA-Yml003w* were lysed, resolved by 10% SDS-PAGE and immunoblotted with anti-HA. Expected size was roughly 40 kDa. HA, hemagglutinin.

**SUPPLEMENTARY FIGURE 2:** Conservation of the hVARP N-terminal domain and the VAMP7-interacting domain. (A) Schematic of Vrl1 and hVARP with curated domains (Tamura *et al.*, 2011) including Ankyrin repeat domains (ANKR), the VAMP7 interacting domain (VID) and key Rab32/38-interacting residues. (B) An alignment of the N-terminus of hVARP/Vrl1 shows broad conservation. (C) Partial conservation of the VAMP7-interacting domain.

**SUPPLEMENTARY FIGURE 3:** All NubG iMYTH and GFP-*MUK1* vectors were expressed. (A) iMYTH strains expressing different Nub-HA-tagged GEFs were lysed and immunoblotted with anti-HA to determine relative expression levels. (B) By immunoblotting with anti-HA, strains with *ADH1pr-GFP-Muk1* vectors were found to express GFP-Muk1 at similar levels. HA, hemagglutinin.



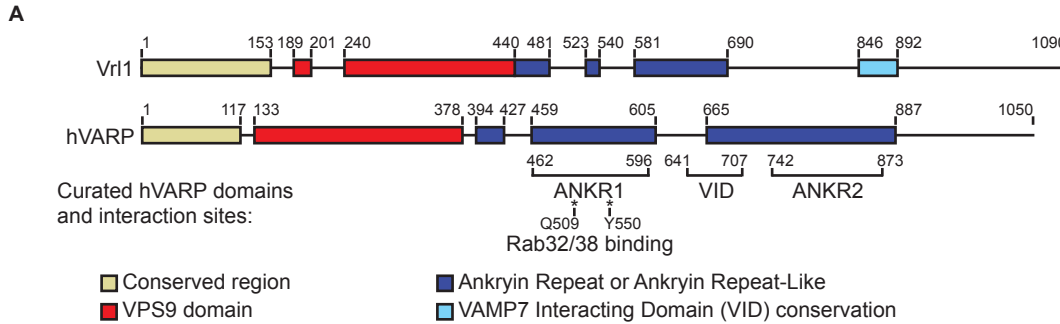

**B. N-terminal Conservation**

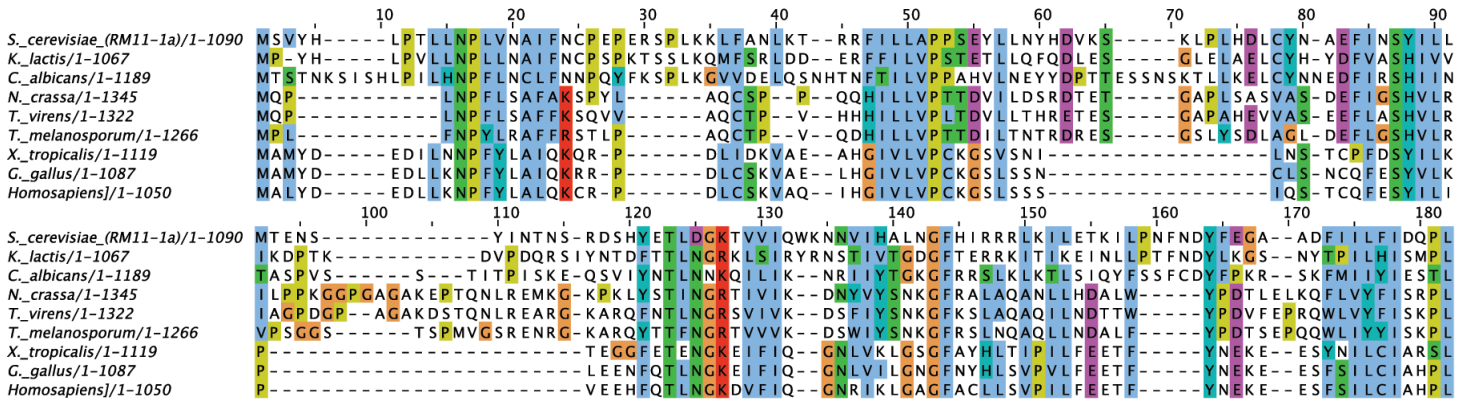

**C. VAMP7 Interacting Domain**

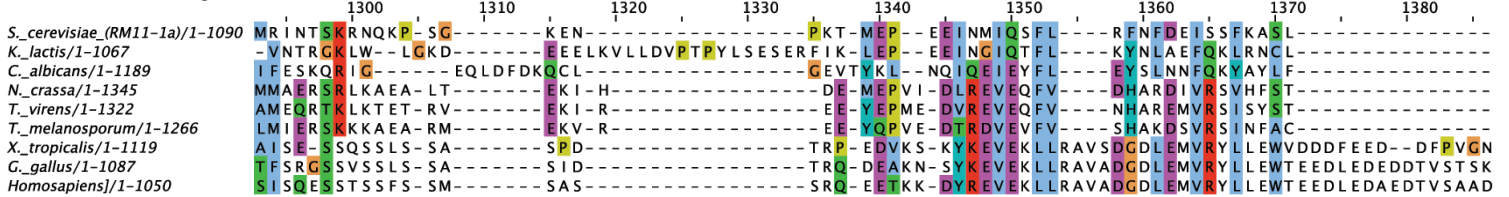

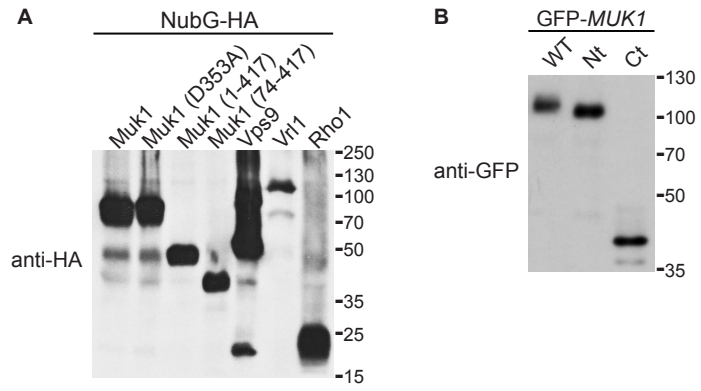

SUPPLEMENTARY FIGURE 3

**Supplementary Table 1. Strains used in this work**

| <b>Strain ID</b> | <b>Genotype</b>                                                                                         | <b>Source or Reference</b>                                          |
|------------------|---------------------------------------------------------------------------------------------------------|---------------------------------------------------------------------|
| BY4741           | <i>MATa his3Δ1; leu2Δ0; met15Δ0; ura3Δ0</i>                                                             | O'shea Lab                                                          |
| Vps5-TAP         | <i>BY4741 VPS5-TAP::HIS3</i>                                                                            | Yeast Tap-tagged fusion library (Ghaemmaghami <i>et al.</i> , 2003) |
| Vps17-TAP        | <i>BY4741 VPS17-TAP::HIS3</i>                                                                           | Yeast Tap-tagged fusion library                                     |
| Vps26-TAP        | <i>BY4741 VPS26-TAP::HIS3</i>                                                                           | Yeast Tap-tagged fusion library                                     |
| Vps29-TAP        | <i>BY4741 VPS29-TAP::HIS3</i>                                                                           | Yeast Tap-tagged fusion library                                     |
| Vps35-TAP        | <i>BY4741 VPS35-TAP::HIS3</i>                                                                           | Yeast Tap-tagged fusion library                                     |
| BBY203           | <i>BY4741 VPS35-GFP::KAN</i>                                                                            | This Study                                                          |
| BBY204           | <i>BY4741 NatNT2::ADH1-3HA-VPS9</i>                                                                     | This Study                                                          |
| BBY207           | <i>BY4741 NatNT2::ADH1-3HA-VPS9 VPS35-GFP::KAN</i>                                                      | This Study                                                          |
| BBY208           | <i>BY4741 NatNT2::ADH1-3HA-MUK1 VPS35-GFP::KAN</i>                                                      | This Study                                                          |
| CUY4412          | <i>MATα VPS26-GFP::KANMX4 his3D200 leu2D0 lys2D0 met15D0 ura3D0</i>                                     | Balderhaar <i>et al.</i> 2010                                       |
| BBY210           | <i>CUY4412 muk1Δ::NAT</i>                                                                               | This Study                                                          |
| BBY211           | <i>CUY4412 vps9Δ::HIS3</i>                                                                              | This Study                                                          |
| BBY212           | <i>CUY4412 muk1Δ::NATR vps9Δ::HIS3</i>                                                                  | This Study                                                          |
| BBY177           | <i>BY4741 muk1Δ::KANR</i>                                                                               | This Study                                                          |
| BBY201           | <i>BY4741 vps9Δ::HIS3</i>                                                                               | This Study                                                          |
| BBY182           | <i>BY4741 muk1Δ::KANR vps9Δ::HIS3</i>                                                                   | This Study                                                          |
| BBY422           | <i>BY4741 NatNT2::ADH1-3HA-YML003W</i>                                                                  | This Study                                                          |
| MDY956           | <i>CUY4412 vps21Δ::NAT</i>                                                                              | This Study                                                          |
| BBY312           | <i>CUY4412 vps21Δ::NAT ypt52Δ::HPH</i>                                                                  | This Study                                                          |
| NMY51            | <i>his3Δ200 trp1-901 leu2-3,112 LYS2::(lexAop)4-HIS3 ura3::(lexAop)8-lacZ ade2::(lexAop)8-ADE2 GAL4</i> | Snider <i>et al.</i> 2010                                           |
| AO445            | <i>NMY51 VPS5-Cub-LexA-VP16-KANMX</i>                                                                   | This Study                                                          |
| AO447            | <i>NMY51 VPS35-Cub-LexA-VP16-KANMX</i>                                                                  | This Study                                                          |
| AO464            | <i>NMY51 VPS26-Cub-LexA-VP16-KANMX</i>                                                                  | This Study                                                          |
| AO468            | <i>NMY51 Artificial Bait-Cub-LexA-VP16-KANMX</i>                                                        | Snider <i>et al.</i> 2010                                           |
| BBY327           | <i>BY4741 VPS26-tDimer2::URA NatNT2::ADHpr-yeGFP-MUK1</i>                                               | This Study                                                          |
| BBY216           | <i>BY4741 NatNT2::ADHpr-yeGFP-VPS9</i>                                                                  | This Study                                                          |
| BBY322           | <i>BY4741 NatNT2::ADHpr-yeGFP-VPS9 vps35Δ::HPH</i>                                                      | This Study                                                          |
| BBY217           | <i>BY4741 NatNT2::ADHpr-yeGFP-MUK1</i>                                                                  | This Study                                                          |
| BBY324           | <i>BY4741 NatNT2::ADHpr-yeGFP-MUK1 vps35Δ::HPH</i>                                                      | This Study                                                          |
| BBY413           | <i>BY4741 VPS34-GFP+::NAT</i>                                                                           | This Study                                                          |
| BBY414           | <i>BY4741 muk1Δ::KANR VPS34-GFP+::NAT</i>                                                               | This Study                                                          |
| BBY420           | <i>BY4741 vps9Δ::HIS3 VPS34-GFP+::NAT</i>                                                               | This Study                                                          |
| BBY421           | <i>BY4741 muk1Δ::KANR vps9Δ::HIS3 VPS34-GFP+::NAT</i>                                                   | This Study                                                          |
| BBY416           | <i>BY4741 vps21Δ::NATR ypt52Δ::HPH VPS34-GFP+::HIS3</i>                                                 | This Study                                                          |

**Supplementary Table 2.** Plasmids used in this work.

| <b>Plasmid ID</b> | <b>Description</b>                             | <b>Source or Reference</b>                  |
|-------------------|------------------------------------------------|---------------------------------------------|
| pMuk1-HA          | <i>pGAL1pr-MUK1-HA::URA3</i>                   | MORF collection (Gelperin et al., 2005)     |
| pCS11             | <i>pSNF7-RFP::LEU2(CEN)</i>                    | Conibear Lab                                |
| pRS415            | <i>pLEU2(CEN)</i>                              | ATCC#87520                                  |
| pRS416            | <i>pURA3(CEN)</i>                              | ATCC#87521                                  |
| pTS48             | <i>pVPS9::URA3(2μ)</i>                         | Stevens Lab                                 |
| pMUK1(2μ)         | <i>pMUK1::LEU2(2μ)</i>                         | MoBY ORF collection (Ho <i>et al.</i> 2006) |
| pMD120            | <i>pMUK1pr-3HA-MUK1::URA3(CEN)</i>             | This Study (Conibear Lab)                   |
| pBB12             | <i>pMUK1pr-3HA-MUK1(D353A)::URA3(CEN)</i>      | This Study (Conibear Lab)                   |
| pBB33             | <i>pADH1pr-3HA-MUK1::URA3(CEN)</i>             | This Study (Conibear Lab)                   |
| pBB34             | <i>pADH1pr-3HA-MUK1(D353A)::URA3(CEN)</i>      | This Study (Conibear Lab)                   |
| pMD121            | <i>pMUK1pr-GFP-MUK1::URA3(CEN)</i>             | This Study (Conibear Lab)                   |
| pMT1              | <i>pADH1pr-GFP-MUK1::URA3(CEN)</i>             | This Study (Conibear Lab)                   |
| pBB14             | <i>pADH1pr-GFP-MUK1(D353A)::URA3(CEN)</i>      | This Study (Conibear Lab)                   |
| pMT2              | <i>pADH1pr-GFP-MUK1(503-612)::URA3(CEN)</i>    | This Study (Conibear Lab)                   |
| pBB15             | <i>pADH1pr-GFP-MUK1(1-575)::URA(CEN)</i>       | This Study (Conibear Lab)                   |
| pBB23             | <i>pADH1pr-VRL1::URA3(CEN)</i>                 | This Study (Conibear Lab)                   |
| pBB33             | <i>pVRL1pr-3HA-VRL1::URA3(CEN)</i>             | This Study (Conibear Lab)                   |
| pBB28             | <i>pVRL1pr-3HA-VRL1(D373A)::URA3(CEN)</i>      | This Study (Conibear Lab)                   |
| pBB32             | <i>pADH1pr-GFP-VRL1::URA3(CEN)</i>             | This Study (Conibear Lab)                   |
| pAO538            | <i>pCYC1pr-NubG-HA-MUK1(1-417i)::TRP1(2μ)</i>  | This Study (Stagljar Lab)                   |
| pAO542            | <i>pCYC1pr-NubG-HA-MUK1(74-417i)::TRP1(2μ)</i> | This Study (Stagljar Lab)                   |
| pA0531            | <i>pCYC1pr-NubG-HA-MUK1(D353A)::TRP1(2μ)</i>   | This Study (Stagljar Lab)                   |
| pAO470            | <i>pCYC1pr-NubG-HA-MUK1::TRP1(2μ)</i>          | This Study (Stagljar Lab)                   |
| pBB9              | <i>pCYC1pr-NubG-HA-VPS9::TRP1(2μ)</i>          | This Study (Conibear Lab)                   |
| pBB24             | <i>pCYC1pr-NubG-HA-VRL1::TRP1(2μ)</i>          | This Study (Conibear Lab)                   |
| pPR3N-NubG-Rho1   | <i>pCYC1pr-NubG-HA-RHO1::TRP1(2μ)</i>          | Stagljar Lab                                |
| pPR3N-NubI-Rho1   | <i>pCYC1pr-NubI-RHO1::TRP1(2μ)</i>             | Stagljar Lab                                |
| pBB21             | <i>pGFP-FYVE(EEA1)::LEU2(2μ)</i>               | This Study (Conibear Lab)                   |
| pSRG92            | <i>p-myc-VPS21::URA3(2μ)</i>                   | Stevens Lab                                 |
| pSRG93            | <i>p-myc-VPS21(Q66L)::URA3(2μ)</i>             | Stevens Lab                                 |
